# Supplementary material for: Community analysis and co-occurrence patterns in airway microbial communities during health and disease
Source: PubMed Central journal article supplement — ERJ Open Res. 2019 Jul 8;5(3):00128-2017. doi: 10.1183/23120541.00128-2017 (PMC6612604; doi:10.1183/23120541.00128-2017), 2019-07-08

# a – Anterior nares

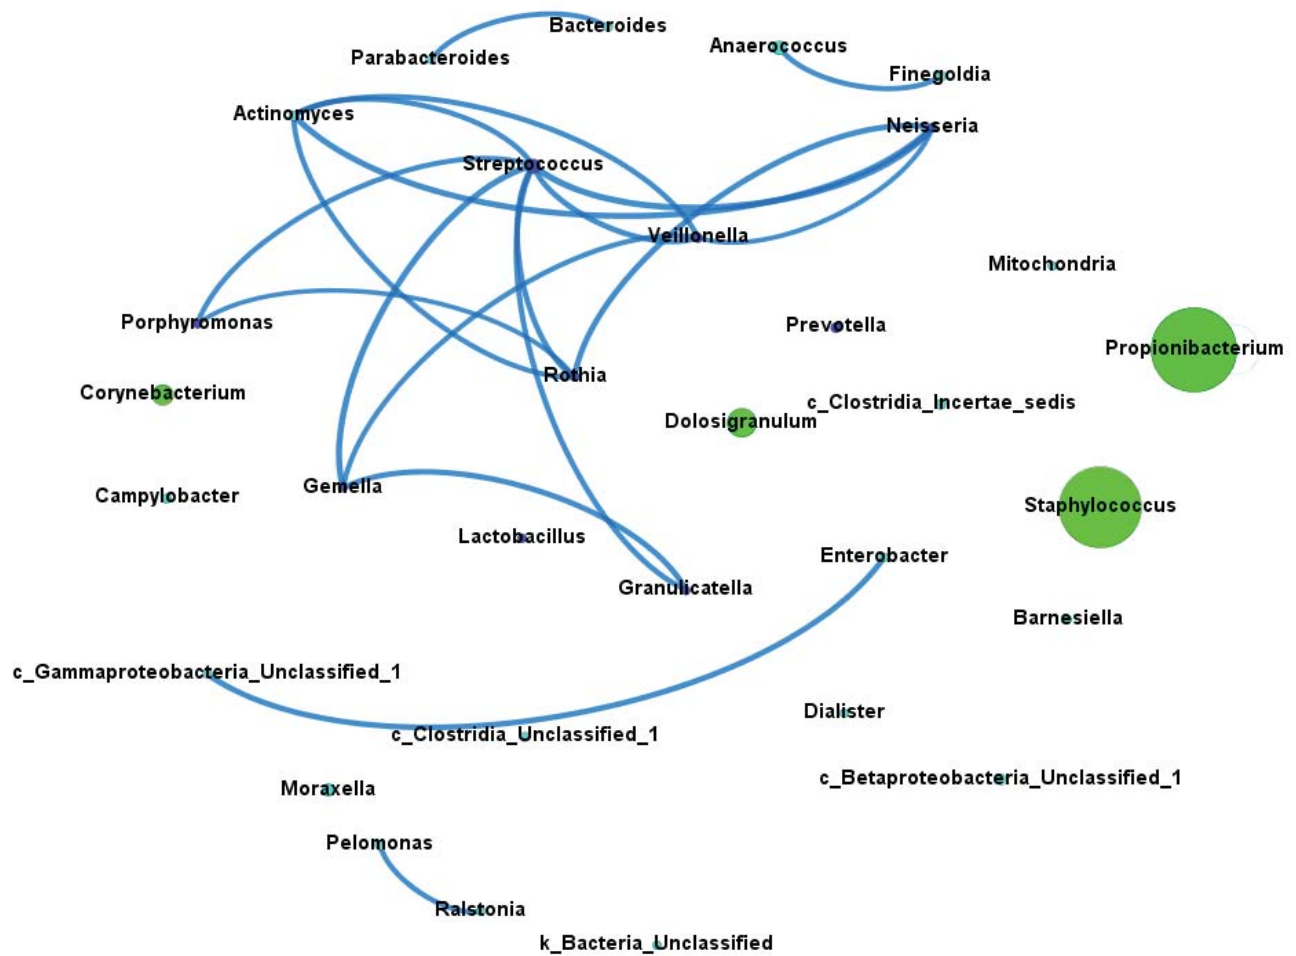

# b – Attached Keratinized Gingiva

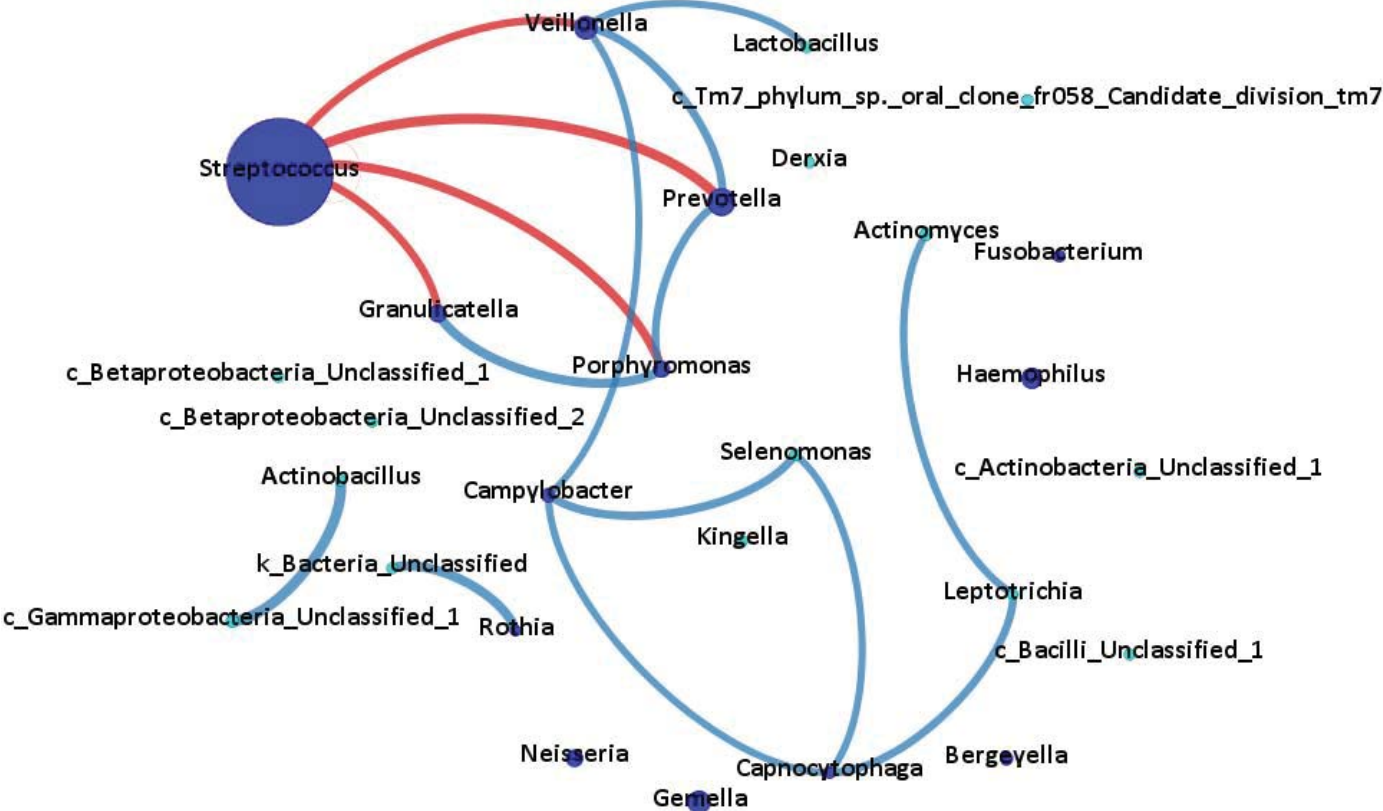

# c – Buccal Mucosa

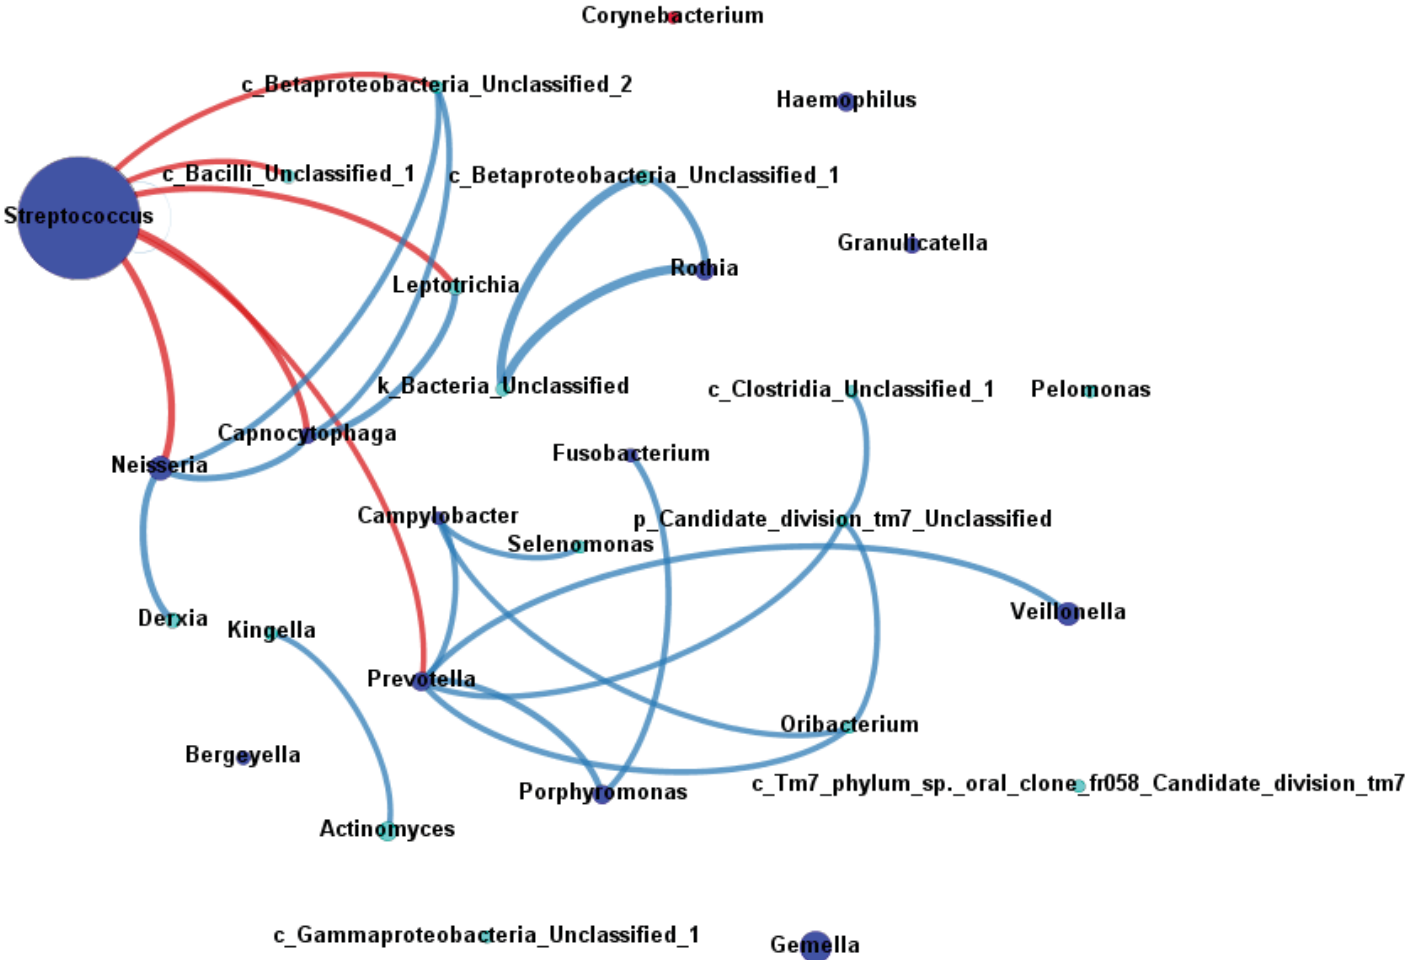

# d – Hard Palate

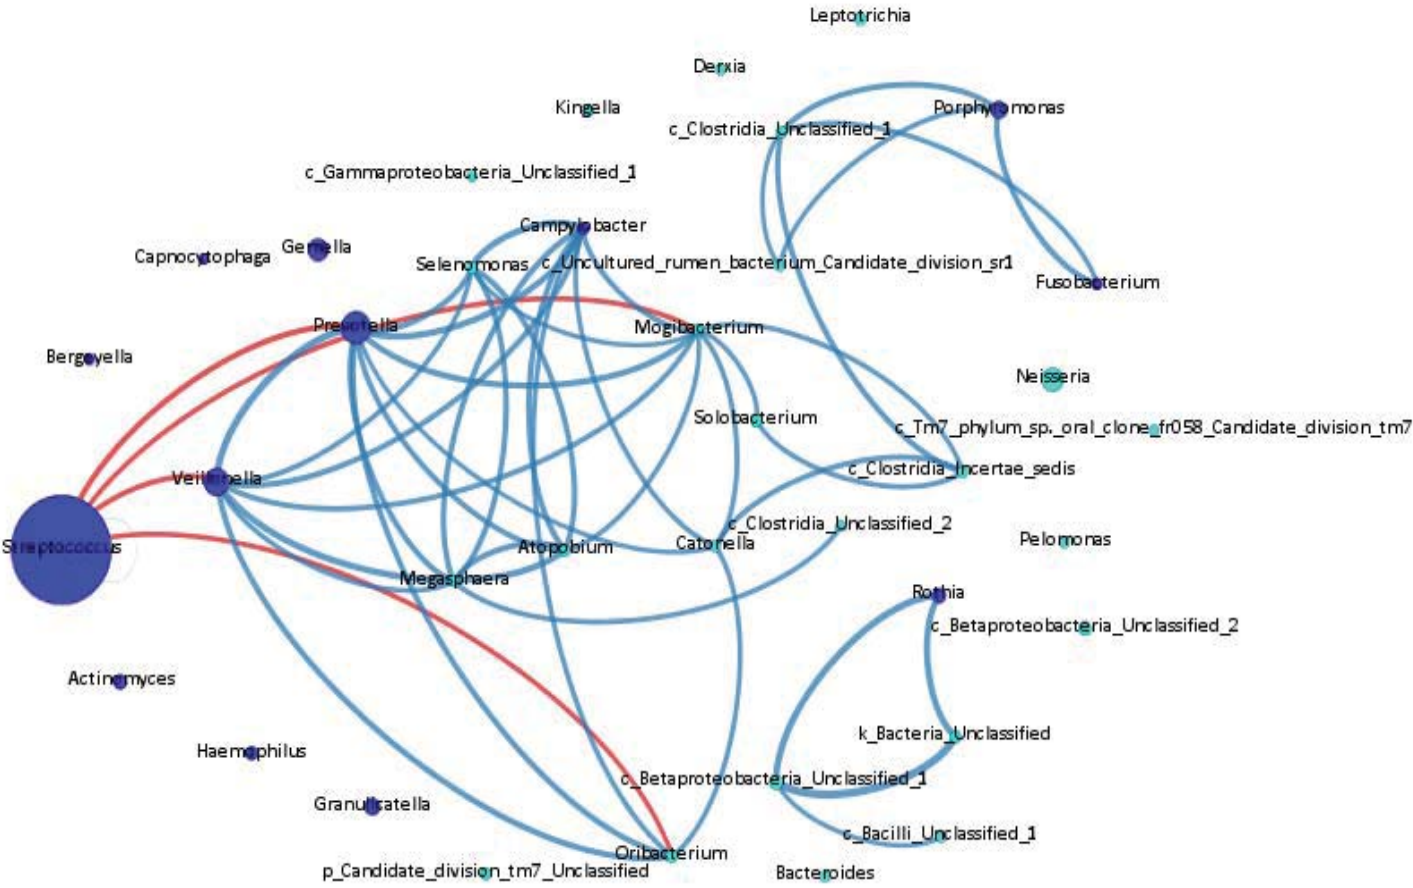

# e – Palatine Tonsils

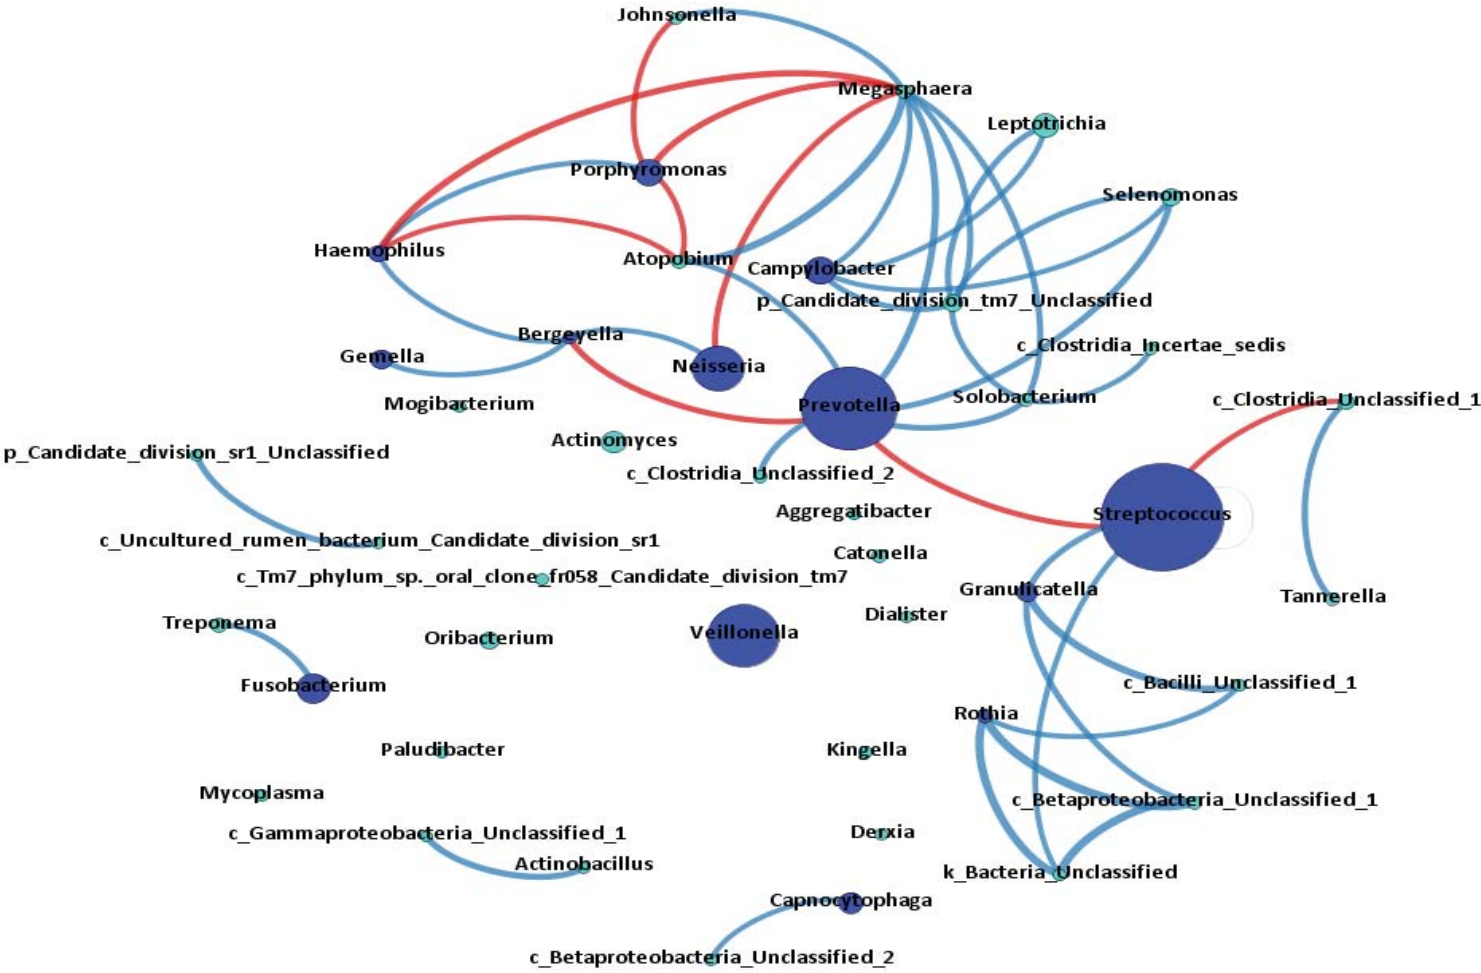

# f – Saliva

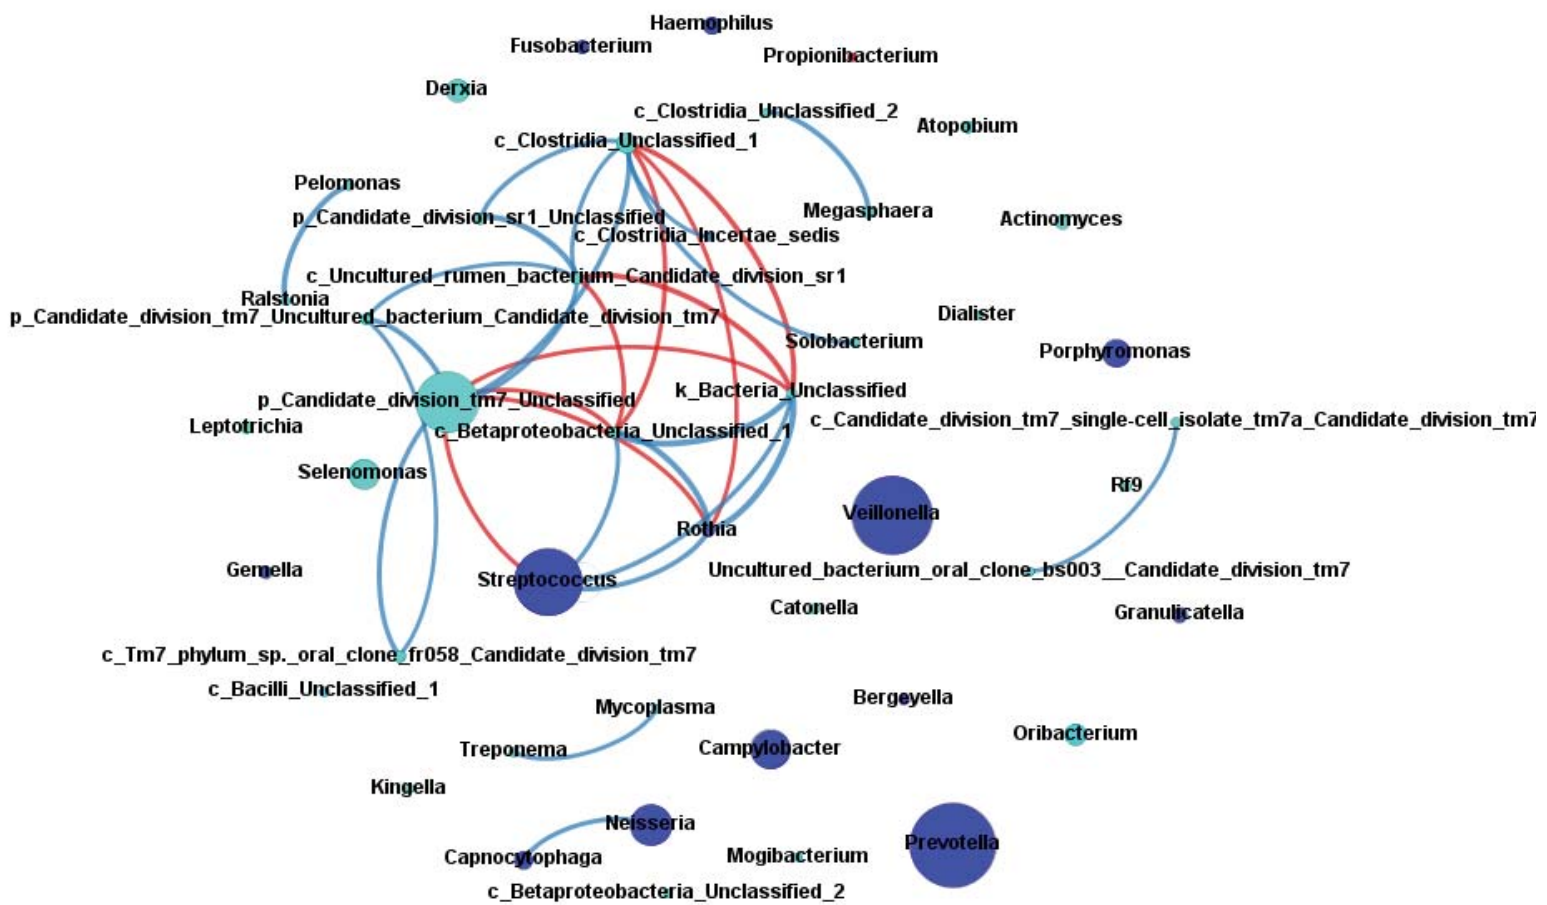



# g – Subgingival Plaque

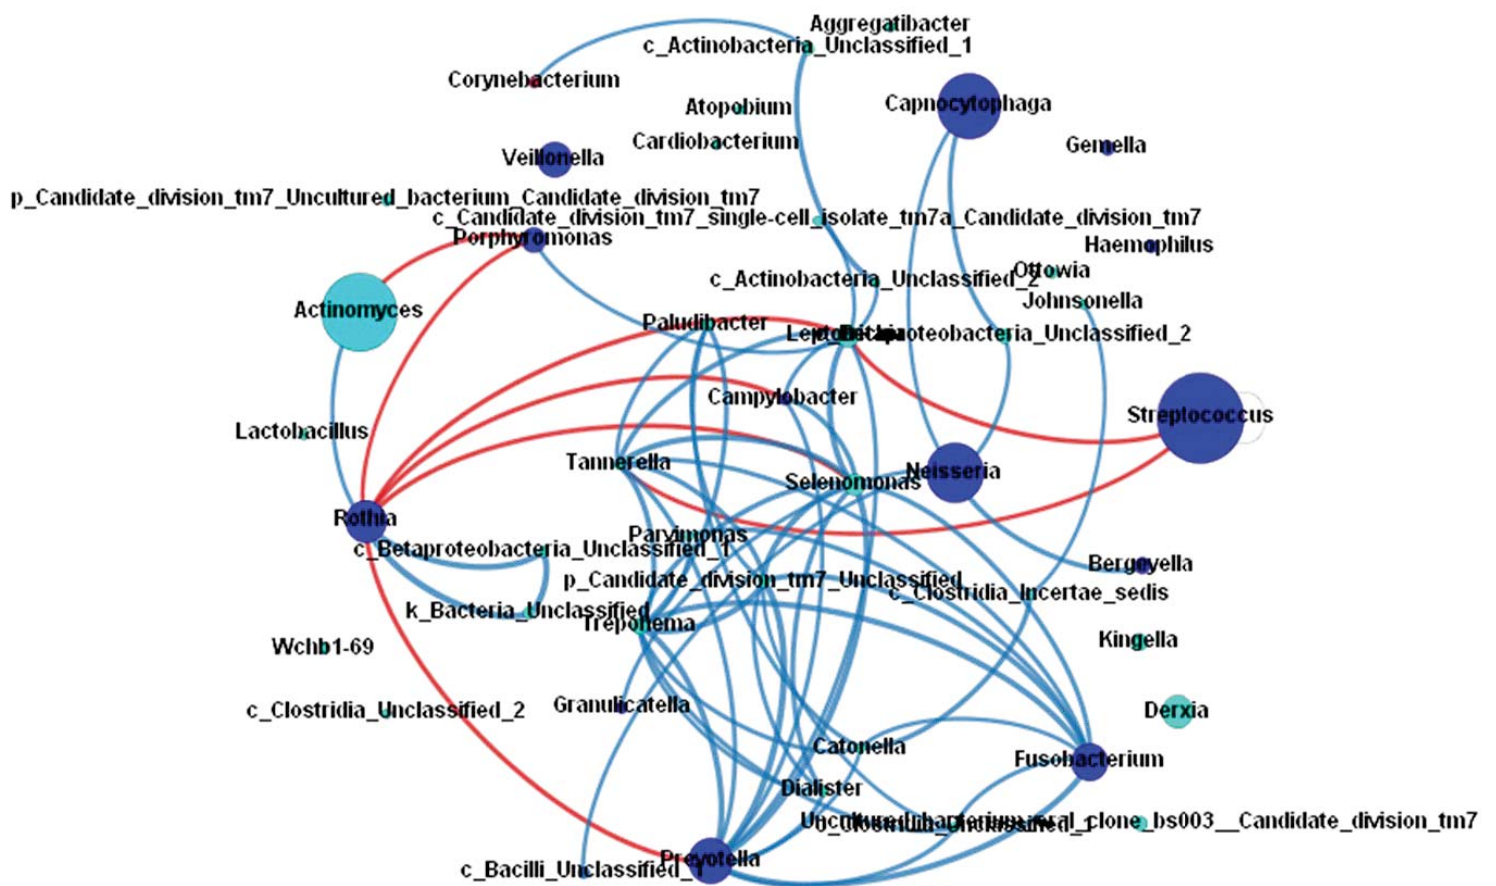





# i – Tongue Dorsum

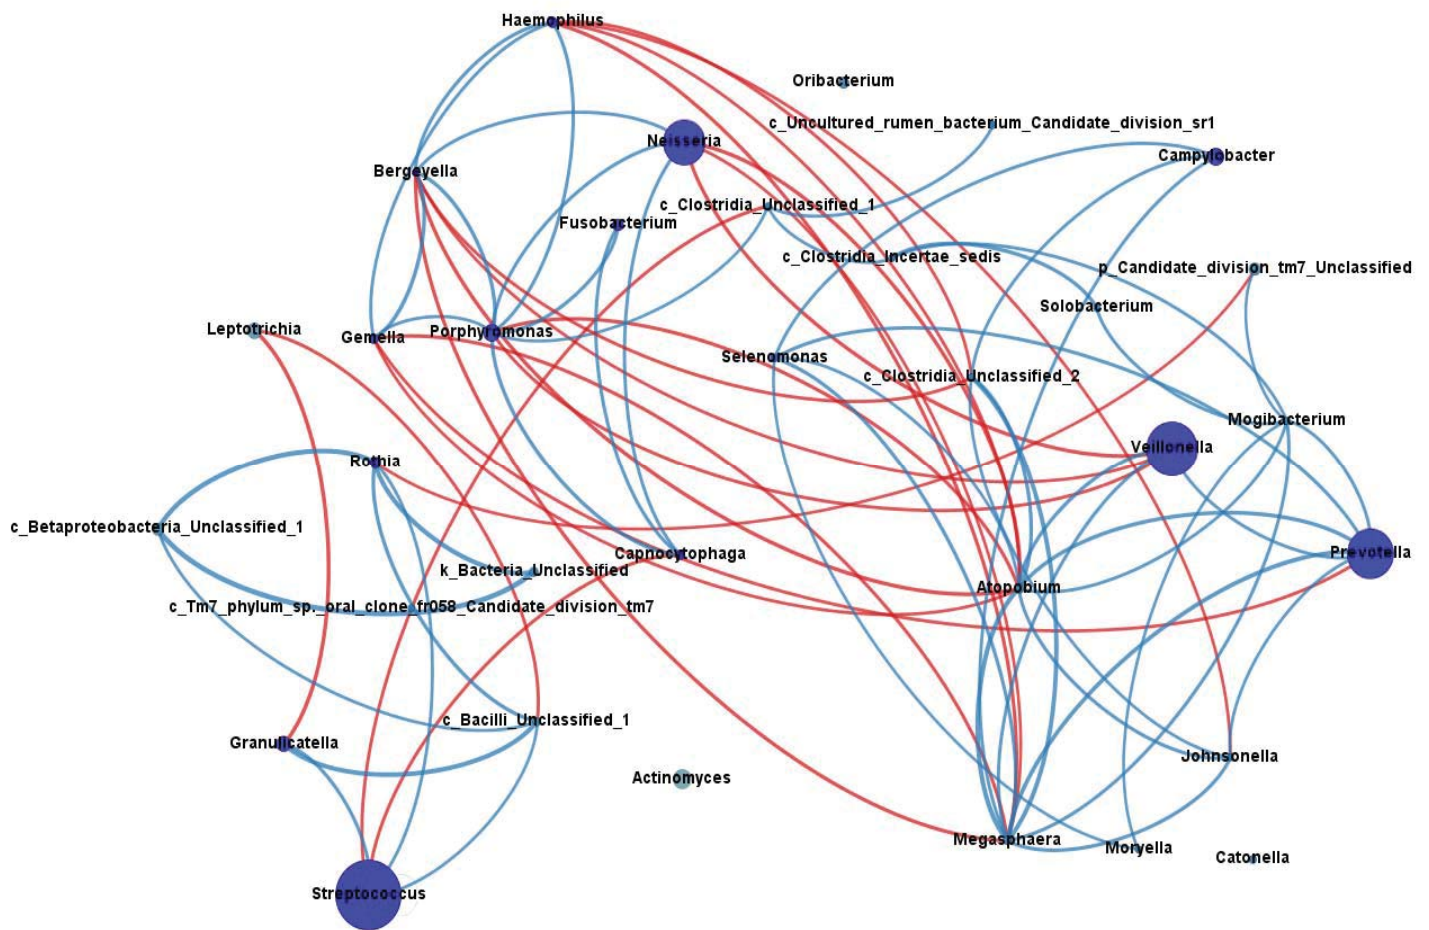

# j – Throat

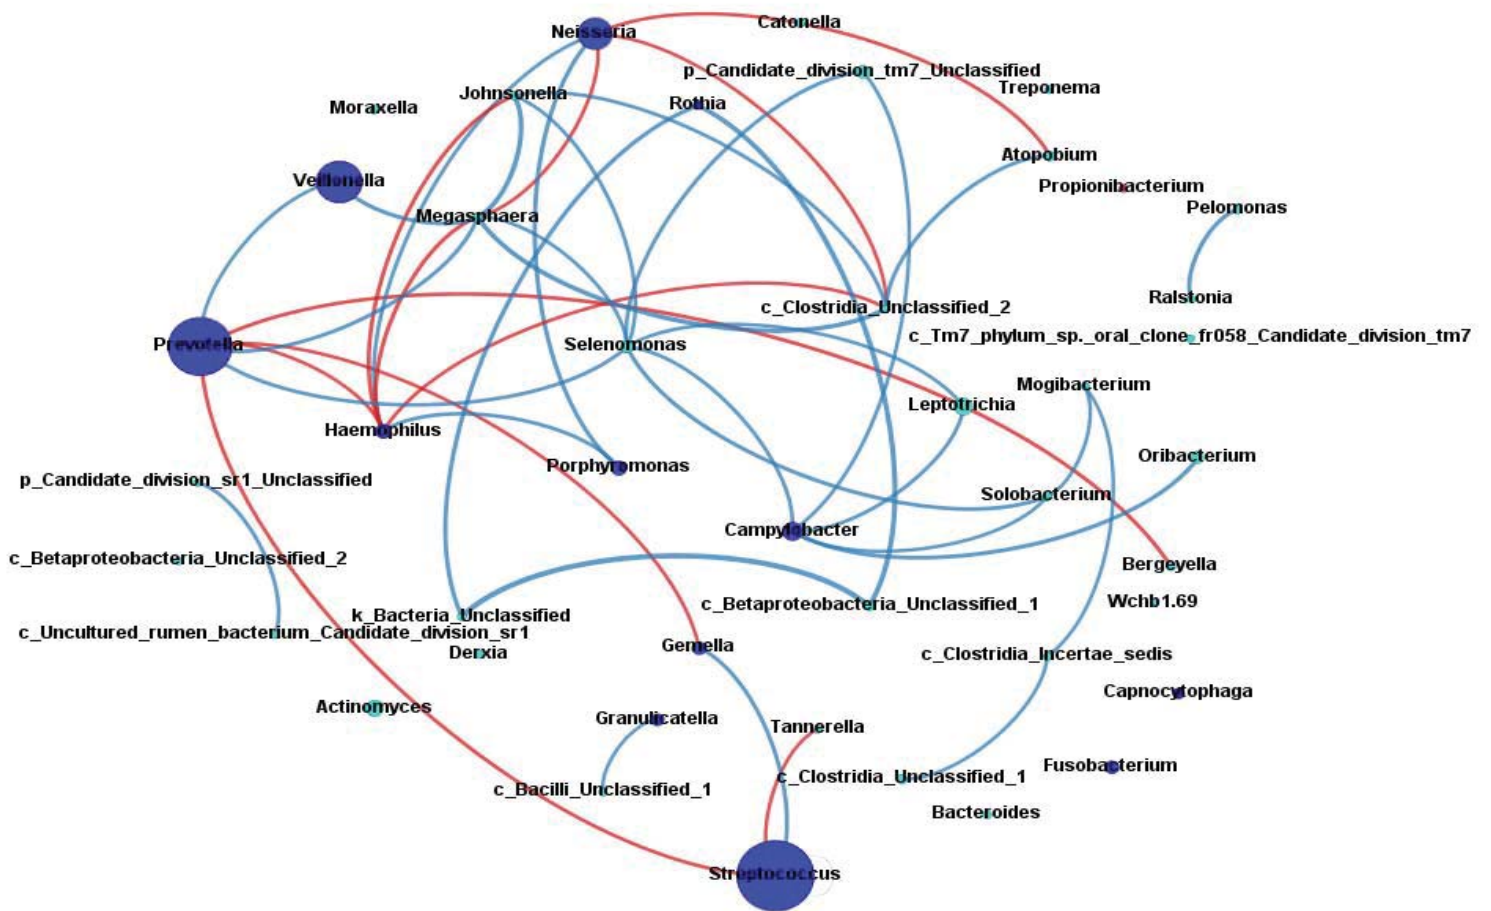

Supplement: 00128-2017.figureS1.pdf [file 00128-2017.figureS1.pdf]
