# Supplementary material for: Community analysis and co-occurrence patterns in airway microbial communities during health and disease
Source: PubMed Central journal article supplement — ERJ Open Res. 2019 Jul 8;5(3):00128-2017. doi: 10.1183/23120541.00128-2017 (PMC6612604; doi:10.1183/23120541.00128-2017), 2019-07-08
Supplement: 00128-2017.tableS1.pdf [file 00128-2017.tableS1.pdf]

**Supplementary Table S1a** Comparison of Shannon-Wiener diversity between individual cohorts. Adjusted *P*-values indicate the level of significant for multivariate comparison testing.

| Comparison Groups | <i>P</i> -Value | <i>P</i> -adj (Bonferroni) | Level of Signif. |
|-------------------|-----------------|----------------------------|------------------|
| AN vs AKG         | 1.99E-01        | 1.00E+00                   | ns               |
| AN vs BE          | 5.23E-01        | 1.00E+00                   | ns               |
| AN vs BM          | 2.85E-04        | 2.22E-02                   |                  |
| AN vs CF          | 2.68E-04        | 2.09E-02                   |                  |
| AN vs CFMW        | 8.59E-02        | 1.00E+00                   | ns               |
| AN vs PT          | 2.20E-16        | 1.72E-14                   |                  |
| AN vs HP          | 5.70E-10        | 4.45E-08                   |                  |
| AN vs SAL         | 2.20E-16        | 1.72E-14                   |                  |
| AN vs SubP        | 2.20E-16        | 1.72E-14                   |                  |
| AN vs SupP        | 2.20E-16        | 1.72E-14                   |                  |
| AN vs TH          | 2.20E-16        | 1.72E-14                   |                  |
| AN vs TD          | 2.20E-16        | 1.72E-14                   |                  |
| AKG vs BE         | 3.06E-01        | 1.00E+00                   | ns               |
| AKG vs BM         | 5.24E-03        | 4.09E-01                   | ns               |
| AKG vs CF         | 3.13E-06        | 2.44E-04                   |                  |
| AKG vs CFMW       | 3.60E-01        | 1.00E+00                   | ns               |
| AKG vs PT         | 2.20E-16        | 1.72E-14                   |                  |
| AKG vs HP         | 4.22E-09        | 3.29E-07                   |                  |
| AKG vs SAL        | 2.20E-16        | 1.72E-14                   |                  |
| AKG vs SubP       | 2.20E-16        | 1.72E-14                   |                  |
| AKG vs SupP       | 2.20E-16        | 1.72E-14                   |                  |
| AKG vs TH         | 2.20E-16        | 1.72E-14                   |                  |
| AKG vs TD         | 2.20E-16        | 1.72E-14                   |                  |
| BE vs BM          | 2.12E-02        | 1.00E+00                   | ns               |
| BE vs CF          | 2.83E-01        | 1.00E+00                   | ns               |
| BE vs CFMW        | 2.28E-01        | 1.00E+00                   | ns               |
| BE vs PT          | 8.85E-10        | 6.90E-08                   |                  |
| BE vs HP          | 9.09E-05        | 7.09E-03                   |                  |
| BE vs SAL         | 3.13E-12        | 2.44E-10                   |                  |
| BE vs SubP        | 2.19E-10        | 1.71E-08                   |                  |
| BE vs SupP        | 2.73E-09        | 2.13E-07                   |                  |
| BE vs TH          | 5.42E-10        | 4.23E-08                   |                  |
| BE vs TD          | 2.33E-09        | 1.82E-07                   |                  |
| BM vs CF          | 7.91E-11        | 6.17E-09                   |                  |
| BM vs CFMW        | 3.64E-01        | 1.00E+00                   | ns               |
| BM vs PT          | 8.11E-14        | 6.33E-12                   |                  |
| BM vs HP          | 1.00E-03        | 7.80E-02                   | ns               |
| BM vs SAL         | 2.20E-16        | 1.72E-14                   |                  |
| BM vs SubP        | 5.04E-16        | 3.93E-14                   |                  |
| BM vs SupP        | 5.66E-14        | 4.41E-12                   |                  |
| BM vs TH          | 1.09E-14        | 8.50E-13                   |                  |
| BM vs TD          | 2.93E-13        | 2.29E-11                   |                  |
| CF vs CFMW        | 8.17E-04        | 6.37E-02                   | ns               |
| CF vs PT          | 2.20E-16        | 1.72E-14                   |                  |
| CF vs HP          | 2.20E-16        | 1.72E-14                   |                  |
| CF vs SAL         | 2.20E-16        | 1.72E-14                   |                  |
| CF vs SubP        | 2.20E-16        | 1.72E-14                   |                  |
| CF vs SupP        | 2.20E-16        | 1.72E-14                   |                  |
| CF vs TH          | 2.20E-16        | 1.72E-14                   |                  |
| CF vs TD          | 2.20E-16        | 1.72E-14                   |                  |
| CFMW vs PT        | 6.39E-08        | 4.98E-06                   |                  |
| CFMW vs HP        | 3.39E-03        | 2.64E-01                   | ns               |

|              |          |          |    |
|--------------|----------|----------|----|
| CFMW vs SAL  | 1.23E-10 | 9.59E-09 |    |
| CFMW vs SubP | 1.06E-08 | 8.27E-07 |    |
| CFMW vs SupP | 3.29E-08 | 2.57E-06 |    |
| CFMW vs TH   | 1.54E-08 | 1.20E-06 |    |
| CFMW vs TD   | 5.64E-08 | 4.40E-06 |    |
| PT vs HP     | 1.26E-06 | 9.83E-05 |    |
| PT vs SAL    | 2.53E-05 | 1.97E-03 |    |
| PT vs SubP   | 2.47E-02 | 1.00E+00 | ns |
| PT vs SupP   | 5.86E-01 | 1.00E+00 | ns |
| PT vs TH     | 6.86E-01 | 1.00E+00 | ns |
| PT vs TD     | 1.98E-01 | 1.00E+00 | ns |
| HP vs SAL    | 1.50E-14 | 1.17E-12 |    |
| HP vs SubP   | 6.55E-10 | 5.11E-08 |    |
| HP vs SupP   | 6.04E-07 | 4.71E-05 |    |
| HP vs TH     | 1.21E-07 | 9.44E-06 |    |
| HP vs TD     | 1.71E-05 | 1.33E-03 |    |
| SAL vs SubP  | 6.55E-10 | 5.11E-08 |    |
| SAL vs SupP  | 6.04E-07 | 4.71E-05 |    |
| SAL vs TH    | 1.21E-07 | 9.44E-06 |    |
| SAL vs TD    | 1.71E-05 | 1.33E-03 |    |
| SubP vs SupP | 1.59E-01 | 1.00E+00 | ns |
| SubP vs TH   | 6.61E-02 | 1.00E+00 | ns |
| SubP vs TD   | 4.89E-04 | 3.81E-02 | ns |
| SupP vs TH   | 8.65E-01 | 1.00E+00 | ns |
| SupP vs TD   | 1.04E-01 | 1.00E+00 | ns |
| TH vs TD     | 8.01E-02 | 1.00E+00 | ns |

**Supplementary Table S1b** Comparison of taxa richness between individual cohorts. Adjusted *P*-values indicate the level of significant for multivariate comparison testing.

| Comparison Groups | P-Value  | P-adj (Bonferroni) | Level of Signif. |
|-------------------|----------|--------------------|------------------|
| AN vs AKG         | 7.71E-03 | 6.01E-01           | ns               |
| AN vs BM          | 1.05E-04 | 8.18E-03           |                  |
| AN vs BE          | 6.04E-01 | 1.00E+00           | ns               |
| AN vs CF          | 9.10E-04 | 7.10E-02           | ns               |
| AN vs CFMW        | 9.62E-01 | 1.00E+00           | ns               |
| AN vs HP          | 8.45E-10 | 6.59E-08           |                  |
| AN vs PT          | 1.24E-13 | 9.67E-12           |                  |
| AN vs SAL         | 1.82E-13 | 1.42E-11           |                  |
| AN vs SubP        | 1.64E-10 | 1.28E-08           |                  |
| AN vs SupP        | 1.51E-07 | 1.18E-05           |                  |
| AN vs TD          | 1.69E-08 | 1.32E-06           |                  |
| AN vs TH          | 2.57E-12 | 2.00E-10           |                  |
| AKG vs BM         | 2.76E-13 | 2.15E-11           |                  |
| AKG vs BE         | 2.91E-01 | 1.00E+00           | ns               |
| AKG vs CF         | 1.16E-01 | 1.00E+00           | ns               |
| AKG vs CFMW       | 8.96E-02 | 1.00E+00           | ns               |
| AKG vs HP         | 1.21E-07 | 9.44E-06           |                  |
| AKG vs PT         | 2.20E-16 | 1.72E-14           |                  |
| AKG vs SAL        | 2.20E-16 | 1.72E-14           |                  |
| AKG vs SubP       | 2.20E-16 | 1.72E-14           |                  |
| AKG vs SupP       | 2.20E-16 | 1.72E-14           |                  |
| AKG vs TD         | 2.20E-16 | 1.72E-14           |                  |
| AKG vs TH         | 2.20E-16 | 1.72E-14           |                  |
| BM vs BE          | 5.11E-03 | 3.98E-01           | ns               |

|              |          |          |    |
|--------------|----------|----------|----|
| BM vs CF     | 1.56E-12 | 1.22E-10 |    |
| BM vs CFMW   | 1.32E-02 | 1.00E+00 | ns |
| BM vs HP     | 1.02E-03 | 7.92E-02 | ns |
| BM vs PT     | 2.00E-07 | 1.56E-05 |    |
| BM vs SAL    | 4.12E-09 | 3.21E-07 |    |
| BM vs SubP   | 1.41E-04 | 1.10E-02 |    |
| BM vs SupP   | 1.12E-01 | 1.00E+00 | ns |
| BM vs TD     | 8.68E-02 | 1.00E+00 | ns |
| BM vs TH     | 6.92E-06 | 5.40E-04 |    |
| BE vs CF     | 1.83E-01 | 1.00E+00 | ns |
| BE vs CFMW   | 6.80E-01 | 1.00E+00 | ns |
| BE vs HP     | 1.09E-05 | 8.50E-04 |    |
| BE vs PT     | 1.34E-07 | 1.05E-05 |    |
| BE vs SAL    | 4.52E-08 | 3.53E-06 |    |
| BE vs SubP   | 5.56E-06 | 4.34E-04 |    |
| BE vs SupP   | 2.93E-04 | 2.29E-02 |    |
| BE vs TD     | 9.36E-05 | 7.30E-03 |    |
| BE vs TH     | 7.88E-07 | 6.15E-05 |    |
| CF vs CFMW   | 2.64E-02 | 1.00E+00 | ns |
| CF vs HP     | 2.20E-16 | 1.72E-14 |    |
| CF vs PT     | 2.20E-16 | 1.72E-14 |    |
| CF vs SAL    | 2.20E-16 | 1.72E-14 |    |
| CF vs SubP   | 2.20E-16 | 1.72E-14 |    |
| CF vs SupP   | 2.20E-16 | 1.72E-14 |    |
| CF vs TD     | 2.20E-16 | 1.72E-14 |    |
| CF vs TH     | 2.20E-16 | 1.72E-14 |    |
| CFMW vs HP   | 4.70E-05 | 3.67E-03 |    |
| CFMW vs PT   | 5.78E-07 | 4.51E-05 |    |
| CFMW vs SAL  | 1.58E-07 | 1.23E-05 |    |
| CFMW vs SubP | 1.24E-05 | 9.67E-04 |    |
| CFMW vs SupP | 3.87E-04 | 3.02E-02 |    |
| CFMW vs TD   | 2.55E-04 | 1.99E-02 |    |
| CFMW vs TH   | 2.48E-06 | 1.93E-04 |    |
| HP vs PT     | 1.39E-02 | 1.00E+00 | ns |
| HP vs SAL    | 3.93E-05 | 3.07E-03 |    |
| HP vs SubP   | 2.13E-01 | 1.00E+00 | ns |
| HP vs SupP   | 1.12E-01 | 1.00E+00 | ns |
| HP vs TD     | 7.65E-03 | 5.97E-01 | ns |
| HP vs TH     | 1.08E-01 | 1.00E+00 | ns |
| PT vs SAL    | 4.06E-02 | 1.00E+00 | ns |
| PT vs SubP   | 4.64E-01 | 1.00E+00 | ns |
| PT vs SupP   | 4.51E-04 | 3.52E-02 |    |
| PT vs TD     | 3.38E-07 | 2.64E-05 |    |
| PT vs TH     | 4.17E-01 | 1.00E+00 | ns |
| SAL vs SubP  | 2.99E-02 | 1.00E+00 | ns |
| SAL vs SupP  | 5.94E-06 | 4.63E-04 |    |
| SAL vs TD    | 2.84E-10 | 2.22E-08 |    |
| SAL vs TH    | 8.09E-03 | 6.31E-01 | ns |
| SubP vs SupP | 2.01E-02 | 1.00E+00 | ns |
| SubP vs TD   | 1.96E-03 | 1.53E-01 | ns |
| SubP vs TH   | 9.50E-01 | 1.00E+00 | ns |
| SupP vs TD   | 8.49E-01 | 1.00E+00 | ns |
| SupP vs TH   | 4.91E-03 | 3.83E-01 | ns |
| TD vs TH     | 4.68E-05 | 3.65E-03 |    |
