# Supplementary material for: Community analysis and co-occurrence patterns in airway microbial communities during health and disease
Source: PubMed Central journal article supplement — ERJ Open Res. 2019 Jul 8;5(3):00128-2017. doi: 10.1183/23120541.00128-2017 (PMC6612604; doi:10.1183/23120541.00128-2017), 2019-07-08
Supplement: 00128-2017.tableS4.pdf [file 00128-2017.tableS4.pdf]

**Supplementary Table 4:** Factors associated with the microbiota community structure in CF only, as assessed using PERMANOVA with the adonis function (9999 permutations) of the unweighted and weighted UniFrac distances metrics and Bray-Curtis dissimilarities <sup>a</sup>

| Parameter                                      | Unweighted UniFrac |                |                     | Weighted UniFrac |                |         | Bray-Curtis    |                |         |
|------------------------------------------------|--------------------|----------------|---------------------|------------------|----------------|---------|----------------|----------------|---------|
|                                                | Pseudo-F ratio     | R <sup>2</sup> | P value             | Pseudo-F ratio   | R <sup>2</sup> | P value | Pseudo-F ratio | R <sup>2</sup> | P value |
| Hypervariable region sequenced (V1V2 vs. V1V3) | 8.17               | 0.066          | <1*10 <sup>-4</sup> | 3.16             | 0.025          | 0.017   | 3.49           | 0.030          | 0.006   |

<sup>a</sup> PERMANOVA, permutational multivariate analysis of variance.
