# Supplementary figures and images for: Community analysis and co-occurrence patterns in airway microbial communities during health and disease
Source: PubMed Central journal article supplement — ERJ Open Res. 2019 Jul 8;5(3):00128-2017. doi: 10.1183/23120541.00128-2017 (PMC6612604; doi:10.1183/23120541.00128-2017), 2019-07-08

Relative Abundance

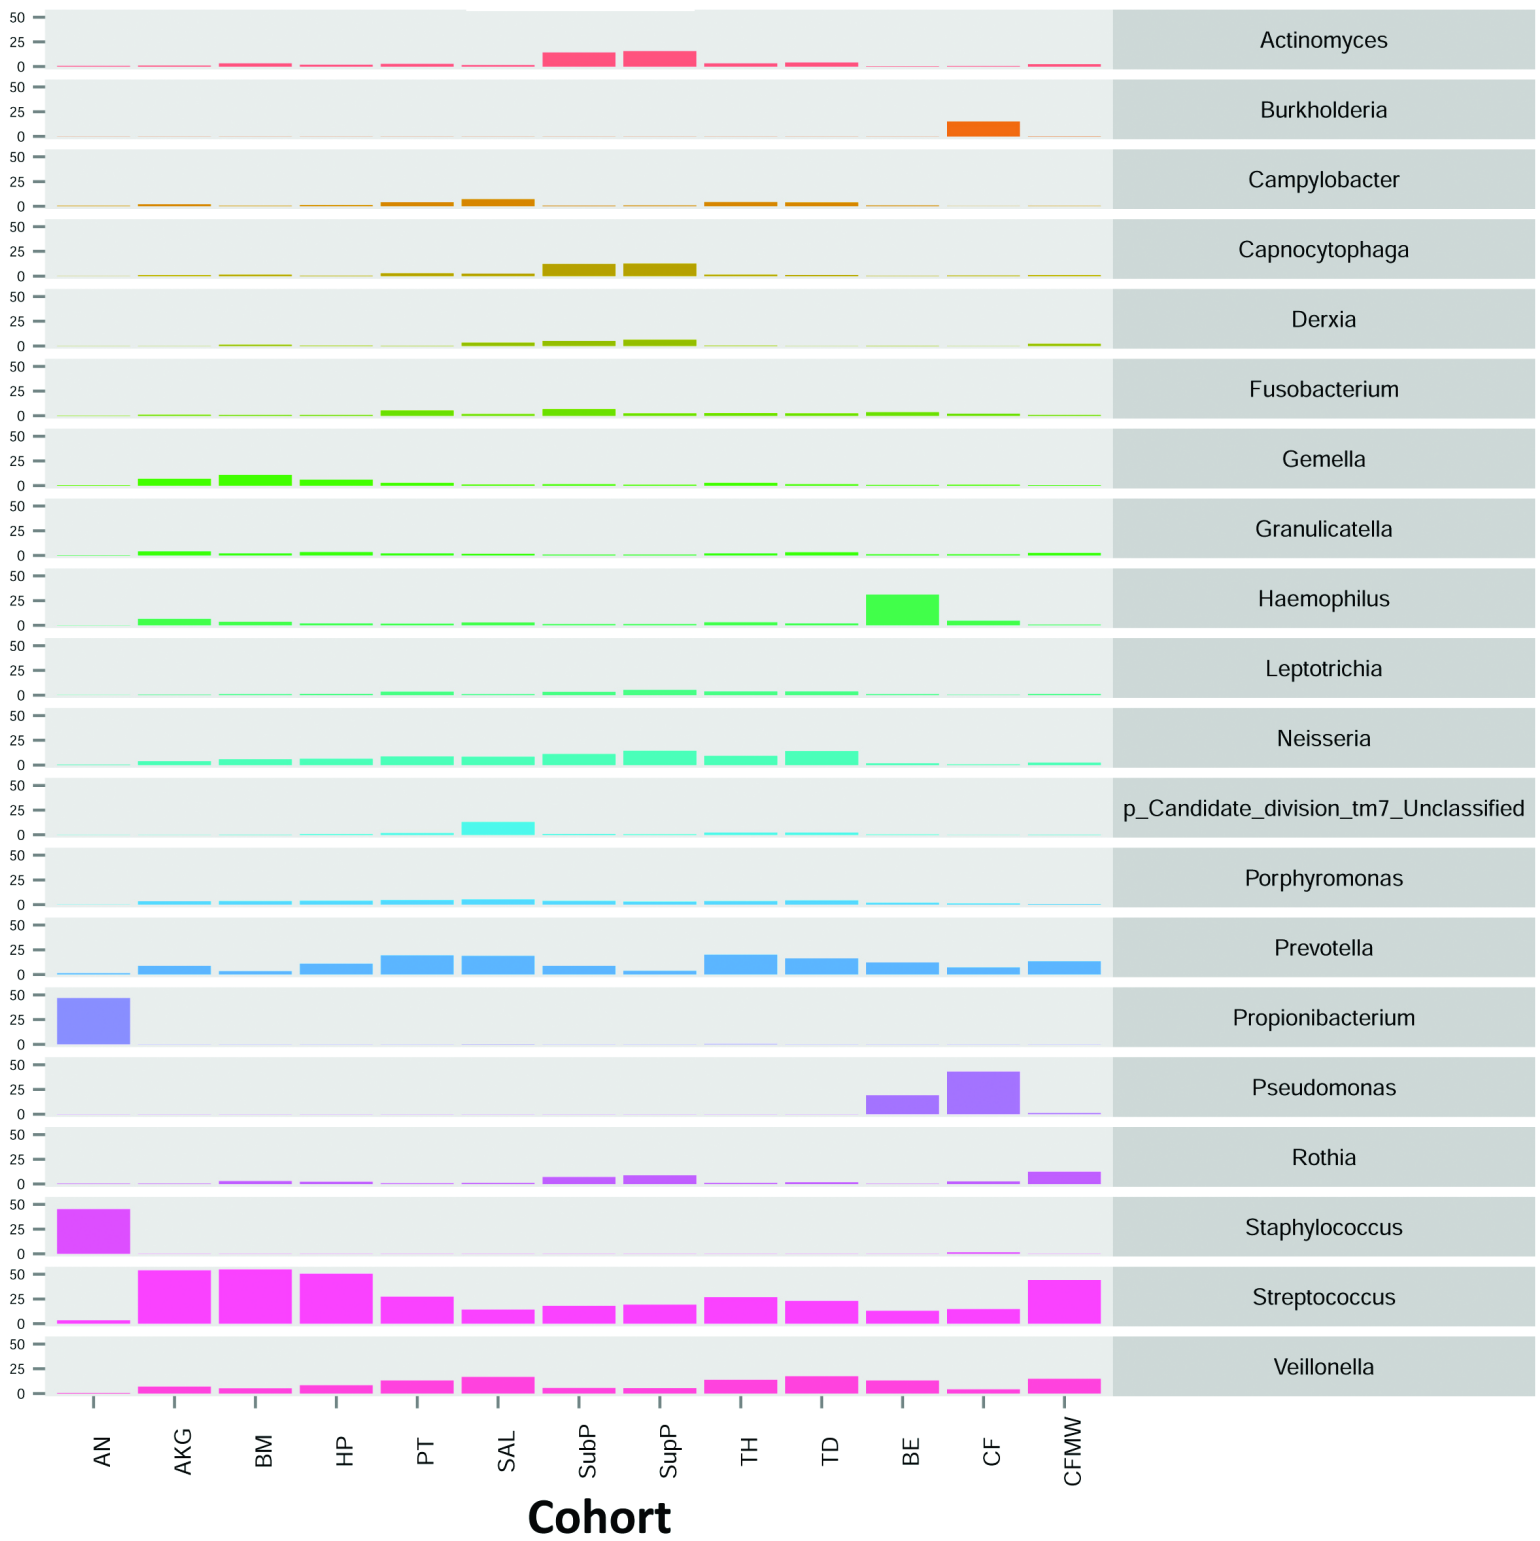

Supplement: 00128-2017.figureS2.pdf [file 00128-2017.figureS2.pdf]
